# Supplementary material for: Synthesis and Characterization of Feed-Grade Monocalcium Phosphate Ca(H2PO4)2·H2O from Oyster Shell
Source: Hindawi journal article supplement (doi:10.1155/2022/3821717), 2022-01-03
Supplement: f1 [file 3821717.f1.doc]

Supporting Information

# Synthesis and Characterization of Feed-Grade Monocalcium Phosphate, Ca(H2PO4)2·H2O from Oyster Shell

Bac Nguyen Quang, Duc Ta Hong*

School of Chemical Engineering, Hanoi University of Science and Technology, No. 1 Dai Co Viet St. Hanoi, Vietnam.

Table of content:

Figure S1: The powder X-ray diffraction patterns of the oyster shell (black lines) and the simulated one of calcium carbonate in the calcite modification (blue lines) adapted from JCPDS No 86-0174.

Figure S2: The X-ray diffraction patterns of oyster shell residue after digestion with nitric acid.

Figure 2: The powder X-ray diffraction patterns of the oyster shell (black lines) and the simulated one of calcium carbonate in the calcite modification (blue lines) adapted from JCPDS No 86-0174.[S1] The observed XRD powder pattern of the oyster shell is similar to the calcite form of CaCO3.


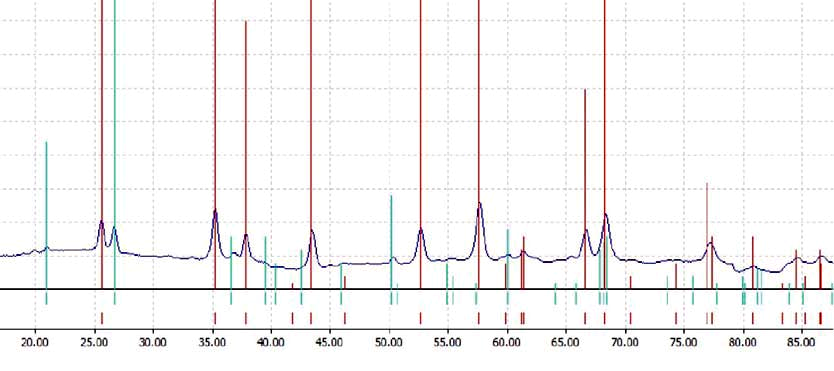


Figure S2: The X-ray diffraction patterns of oyster shell residue after digestion with nitric acid. The green vertical lines represent quartz (SiO2, JCPDS No. 87-2096), and red lines for corundum (Al2O3, JCPDS No. 85-1337).

Reference

[S1] E. N. Maslen, V. A. Streltsov, N. R. Streltsova, and N. Ishizawa, “Electron density and optical anisotropy in rhombohedral carbonates. III. Synchrotron X-ray studies of CaCO3, MgCO3 and MnCO3”, Acta Crystallographica. Vol B51, 929-939, 1995. DOI: 10.1107/S0108768195006434.
